# Supplementary material
Source: PubMed Central journal article supplement (PMC7499037)
Supplement: AEM.01095-20-s0001.pdf [file AEM.01095-20-s0001.pdf]

## **Supporting Information for**

### **The basis of peracetic acid (PAA) inactivation mechanisms for rotavirus and Tulane virus under conditions relevant for vegetable sanitation**

Miyu Fuzawa<sup>1</sup>, Hezi Bai<sup>1</sup>, Joanna L. Shisler<sup>2,3</sup>, and Thanh H. Nguyen<sup>1,3</sup>

<sup>1</sup>Department of Civil and Environmental Engineering, University of Illinois at Urbana-Champaign, Urbana, Illinois, USA; <sup>2</sup>Department of Microbiology, University of Illinois at Urbana-Champaign, Urbana, Illinois, USA; <sup>3</sup>Institute of Genomic Biology, University of Illinois at Urbana-Champaign, Urbana, Illinois, USA.

Corresponding author: Miyu Fuzawa, fuzawa2@illinois.edu

**1 Figure**

**2 Tables**

**3 pages**

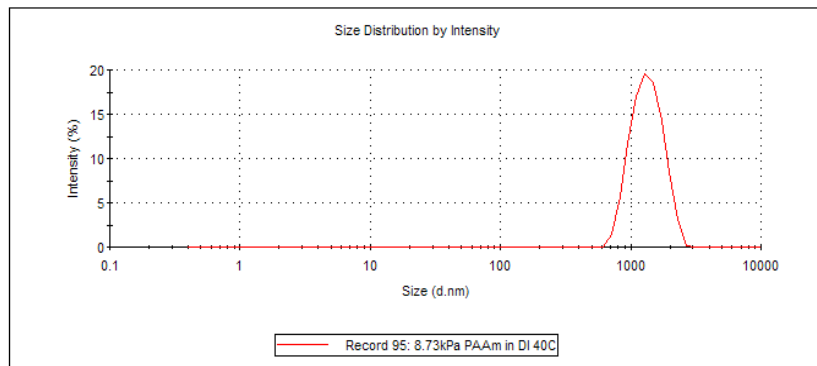

**Figure 1Sa.** Dynamic light scattering measurement of Tulane virus in PAA solution at pH 3

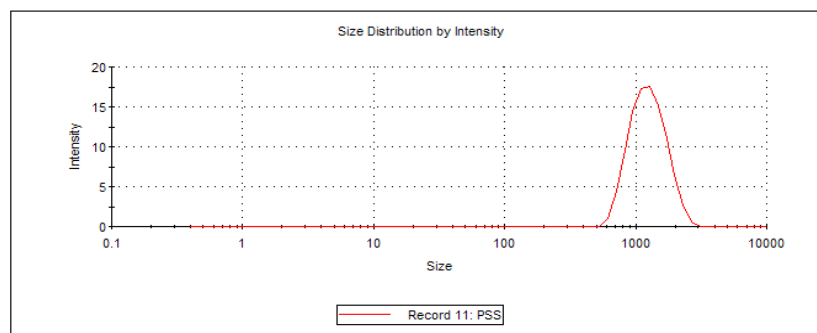

**Figure 1Sb.** Dynamic light scattering measurement of Tulane virus in PAA-free solution at pH 3

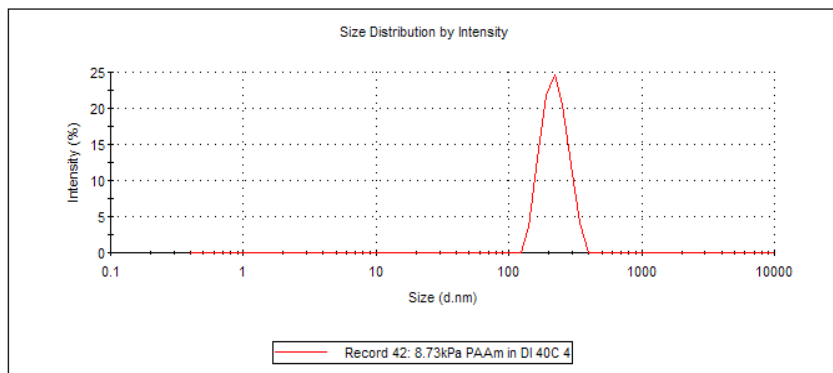

**Figure 1Sc.** Dynamic light scattering measurement of rotavirus in PAA solution at pH 3

**Table 1S.** Comparison of results from binding assay using untreated or PAA-exposed RV with either untreated or neuraminidase-treated PGM-MBs.

| CT (ppm×min) | Log <sub>10</sub> NSP3 copy/μl quantified after binding with untreated PGM-MBs | Log <sub>10</sub> NSP3 copy/μl quantified after binding with neuraminidase treated PGM-MBs | % of loss of binding due to sialic acid digestion in PGM-MBs | Log <sub>10</sub> loss of binding due to sialic acid digestion in PGM-MBs |
|--------------|--------------------------------------------------------------------------------|--------------------------------------------------------------------------------------------|--------------------------------------------------------------|---------------------------------------------------------------------------|
| 0            | 6.72 ± 0.05                                                                    | 5.35 ± 0.14                                                                                | 96 % ± 1%                                                    | 1.4 ± 0.14                                                                |
| 19           | 6.34 ± 0.05                                                                    | 5.96 ± 0.04                                                                                | 58 % ± 4 %                                                   | 0.4 ± 0.04                                                                |
| 38           | 6.27 ± 0.07                                                                    | 5.88 ± 0.08                                                                                | 59 % ± 7 %                                                   | 0.4 ± 0.08                                                                |
| 57           | 6.19 ± 0.03                                                                    | 5.92 ± 0.11                                                                                | 44 % ± 14 %                                                  | 0.3 ± 0.11                                                                |

Average and standard deviation are shown for 3 experiments.

**Table 2S.** Reduction of naked viral genome without capsids exposed to PAA, compared to untreated viral genome.

| CT (ppm×min) | Log <sub>10</sub> reduction of TV NSP gene copy number | Log <sub>10</sub> reduction of RV VP7 gene copy number |
|--------------|--------------------------------------------------------|--------------------------------------------------------|
| 0.5          | 0.49 ± 0.07                                            | 0.25 ± 0.03                                            |
| 2.3          | 0.58 ± 0.05                                            | 0.54 ± 0.07                                            |
| 4.5          | 0.61 ± 0.06                                            | 0.67 ± 0.07                                            |
| 9.4          | 1.02 ± 0.12                                            | 0.78 ± 0.06                                            |

Average and standard deviation are shown for 3 experiments.
